# Supplementary material
Source: PubMed Central journal article supplement (PMC3285443)
Supplement: NIHMS203825-supplement-01.pdf [file NIHMS203825-supplement-01.pdf]

## Supplementary Data

### Synthesis methods for sEH inhibitors 17, 18, 25, 26, 27, 29, 30, 31, and 32.

#### General

The synthesis of compounds and the intermediates prepared specifically for this study are described below. Other inhibitors are from published studies. All reagents and anhydrous solvents were purchased from Aldrich Chemical Company (Milwaukee, WI, USA) unless otherwise noted and used as received. All chemical reactions were conducted under nitrogen atmosphere unless otherwise noted. Reaction progress was monitored using thin-layer chromatography (TLC) 0.2 mm glass plates precoated with silica gel 60 F<sub>254</sub> (E. Merck, Darmstadt, Germany). Chemical detection was based on the quenching of fluorescence from 254 nm ultraviolet light. For those compounds not possessing a suitable chromophore, TLC plates were visualized using either a KMnO<sub>4</sub> solution or I<sub>2</sub> vapor. Flash chromatography was performed with 32-63 μm silica gel (Sorbent Technologies, Atlanta, GA). NMR spectra were recorded on a Varian Mercury 300 (Varian Inc., Palo Alto, CA) in CDCl<sub>3</sub> or DMSO-*d*<sub>6</sub> using tetramethylsilane (TMS) as an internal reference unless otherwise noted. NMR peaks are reported in parts per million (ppm, δ) relative to TMS.

#### *sEH* 17

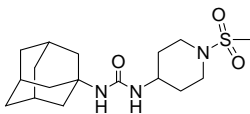

**1-Adamantan-1-yl-3-(1-methanesulfonyl-piperidin-4-yl)-urea**, The adamantyl scaffold was synthesized as described previously [1]. The desired scaffold (807 mg, 2.91 mmol) and 1 mL of TEA were all combined in 15 mL dichloromethane at 0°C. The reaction was allowed to stir. At this point, methanesulfonyl chloride (3.4 mmol), was added and the reaction was allowed to warm to room temperature over 2 hours. After reaching room temperature, the reaction was allowed to stir for 18 hrs. The reaction was then washed with K<sub>2</sub>CO<sub>3(aq)</sub> (1M, 2 x 10 mL) followed by HCl<sub>(aq)</sub> (1M, 2 x 10 mL). The organic layer was dried and evaporated to give a white powder. Recrystallization from acetone afforded the pure product (917 mg, Yield=89%).

<sup>1</sup>H NMR (300 MHz, CDCl<sub>3</sub>) δ ppm 4.16-4.00 (m, 2H), 3.82-3.60 (m, 3H), 2.78 (s, 3H), 2.76-2.69 (m, 2H), 2.12-1.61 (m, 17H), 1.53-1.36 (m, 2H)

#### *sEH* 18

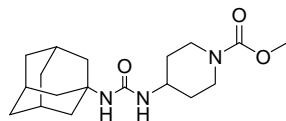

**4-(3-Adamantan-1-yl-ureido)-piperidine-1-carboxylic acid methyl ester**. The adamantyl scaffold was synthesized as described previously. The desired scaffold (592 mg, 2.13 mmol) and 1 mL of TEA were all combined in 15 mL dichloromethane at 0°C. The reaction was allowed to stir. At this point, methyl chloroformate (2.7 mmol), was added and the reaction was allowed to warm to room temperature over 2 hours. After reaching room temperature, the reaction was allowed to stir for 18 hrs. The reaction was

then washed with  $\text{K}_2\text{CO}_{3(\text{aq})}$  (1M, 2 x 10 mL) followed by  $\text{HCl}_{(\text{aq})}$  (1M, 2 x 10 mL). The organic layer was dried and evaporated to give a white powder. Recrystallization from acetone afforded the pure product (459 mg, Yield=64%).

$^1\text{H NMR}$  (300 MHz,  $\text{CDCl}_3$ )  $\delta$  ppm 5.68 (d,  $J = 7.56$  Hz, 1H), 5.42 (s, 1H), 3.82-3.72 (m, 2H), 3.57 (s, 3H), 3.53-3.40 (m, 1H), 3.00-2.85 (m, 2H), 2.03-1.52 (m, 17H), 1.20-1.04 (m, 2H)

### Synthesis of the 4- trifluoromethoxyphenyl scaffold:

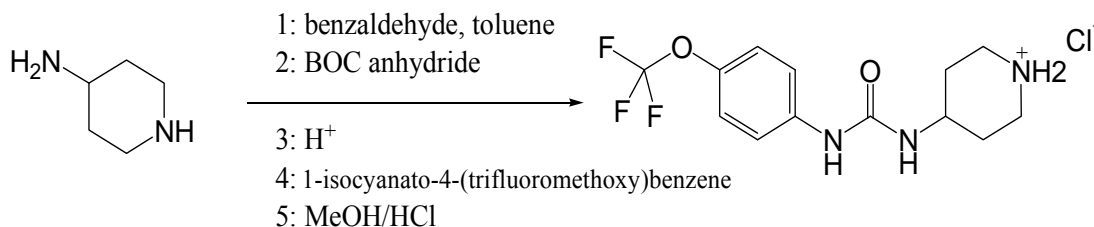

4-Aminopiperidine (4.29 g, 42.8 mmol) was dissolved in toluene (100 mL). To this was added benzaldehyde (4.54 g, 44.6 mmol). The reaction fitted with a Dean-Stark trap and a condenser and was refluxed for 3 hours under an atmosphere of nitrogen. At this point, when no additional water was seen to form, the reaction was cooled to  $0^\circ\text{C}$  and BOC anhydride (9.34g, 42.8 mmol) was added via syringe over 10 minutes. The reaction was allowed to warm to room temperature over 1 hr and was stirred for an additional 17 hrs. The solvent was removed *in vacuo* and the resulting oil was treated with  $\text{KHSO}_{4(\text{aq})}$  (1 M, 42.8 mL). This was stirred for 2 hours. Water (30 mL) and diethylether (50 mL) was added to and stirred for 1.25 hours. The solution was washed with ether. Because of the resulting emulsion, 50 mL of saturated sodium chloride was added. The solution was then basified with  $\text{KOH}_{(\text{s})}$  (pH = 10) and was extracted with dichloromethane (3 x 100 mL). The organic layer was dried over  $\text{MgSO}_4$  and evaporated to give 7.24 g of a yellow/orange oil. To this oil (1.0 g) was added THF (10 mL). This was stirred for 5 minutes until the oil was completely dissolved. The reaction was cooled to  $0^\circ\text{C}$  and 1-isocyanato-4-(trifluoromethoxy)benzene (1.03 mg, 5.0 mmol, 1eq) was added and the reaction stirred overnight under an atmosphere of nitrogen. The solvent was removed and the residue was chromatographed on silica with 5:95 ethylacetate:dichloromethane. The major fraction was collected (1.711g). The resultant residue was treated with a solution of HCl in methanol (20 mL, 1M). This was stirred for 18 hours. Because TLC showed incomplete reaction, another HCl (12M, 1 eq) was added and refluxed for 30 minutes. The solvent was removed and the residue was chromatographed on silica with methanol saturated with ammonia and dichloromethane. The major fraction was collected as white powder (1.03g, 69% yield overall).

### sEHI 24

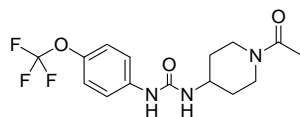

**1-(1-Acetyl-piperidin-4-yl)-3-(4-trifluoromethoxy-phenyl)-urea.** The desired scaffold (258 mg, 0.85 mmol) and an appropriate carboxylic acid (or ester-acid) (0.96 mmol), and DMAP (104 mg, 0.85 mmol) were all combined in dichloromethane at  $0^\circ\text{C}$ . The reaction was allowed to stir for 10 minutes. At this point, EDCI (162 mg, 0.85 mmol) was added

and the reaction was allowed to warm to room temperature over 2 hours. After reaching room temperature, the reaction was allowed to stir for 18 hrs. The reaction was then washed with  $\text{K}_2\text{CO}_3(\text{aq})$  (1M, 2 x 10 mL) followed by  $\text{HCl}(\text{aq})$  (1M, 2 x 10 mL). The organic layer was dried and evaporated to give a white powder. Recrystallization from acetone afforded the pure product (167 mg, Yield=57%).

$^1\text{H}$  NMR (300 MHz,  $\text{D}_6\text{DMSO}$ )  $\delta$  ppm 8.07 (s, 1H), 7.48-7.28 (m, 2H), 7.09 (d,  $J = 8.93$  Hz, 2H), 5.87 (d,  $J = 7.57$  Hz, 1H), 4.53-4.26 (m, 1H), 4.05-3.82 (m, 1H), 3.82-3.70 (m, 1H), 3.29-3.06 (m, 1H), 3.01-2.69 (m, 1H), 2.11 (s, 3H), 2.14-1.87 (m, 2H), 1.40-1.25 (m, 2H), Mp 204-206°C

### *sEHI 25*

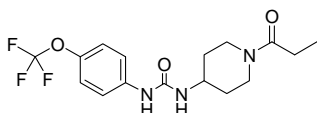

**1-(1-Propionyl-piperidin-4-yl)-3-(4-trifluoromethoxy-phenyl)-urea.** The desired scaffold (242 mg, 0.84 mmol) and 1 mL of TEA were all combined in 15 mL dichloromethane at 0°C. The reaction was allowed to stir. At this point, propionyl chloride (1.1 mmol), was added and stirred for 5 hours and the reaction was allowed to warm to room temperature over 4 hours. The reaction was then washed with  $\text{K}_2\text{CO}_3(\text{aq})$  (1M, 2 x 10 mL) followed by  $\text{HCl}(\text{aq})$  (1M, 2 x 10 mL). The solvent was removed and the residue was chromatographed on silica with 1:1 ethyl acetate:dichloromethane. Recrystallization from acetone afforded the pure product (178 mg, Yield=63%).

$^1\text{H}$  NMR (300 MHz,  $\text{CDCl}_3$ )  $\delta$  ppm 7.95 (s, 1H), 7.44-7.35 (m, 2H), 7.10 (d,  $J = 8.99$  Hz, 2H), 5.89-5.64 (m, 1H), 4.54-4.36 (m, 1H), 3.96-3.68 (m, 2H), 3.26-3.06 (m, 1H), 2.95-2.78 (m, 1H), 2.36 (q,  $J = 7.48, 7.47, 7.47$  Hz, 2H), 2.14-2.00 (m, 1H), 2.00-1.86 (m, 1H), 1.42-1.21 (m, 2H), 1.15 (t,  $J = 7.45, 7.45$  Hz, 3H)

### *sEHI 26*

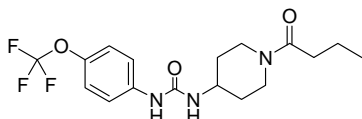

**1-(1-Butyryl-piperidin-4-yl)-3-(4-trifluoromethoxy-phenyl)-urea,** The desired scaffold (242 mg, 0.84 mmol) and 1 mL of TEA were all combined in 15 mL dichloromethane at 0°C. The reaction was allowed to stir. At this point, butyryl chloride (1.1 mmol), was added and stirred for 5 hours and the reaction was allowed to warm to room temperature over 4 hours. The reaction was then washed with  $\text{K}_2\text{CO}_3(\text{aq})$  (1M, 2 x 10 mL) followed by  $\text{HCl}(\text{aq})$  (1M, 2 x 10 mL). The solvent was removed and the residue was chromatographed on silica with 1:1 ethyl acetate:dichloromethane. Recrystallization from acetone afforded the pure product (197 mg, Yield=66%).

$^1\text{H}$  NMR (300 MHz,  $\text{CDCl}_3$ )  $\delta$  ppm 7.75-7.58 (m, 1H), 7.39 (d,  $J = 8.97$  Hz, 2H), 7.12 (d,  $J = 8.86$  Hz, 2H), 5.55-5.40 (m, 1H), 4.49 (d,  $J = 13.96$  Hz, 1H), 4.02-3.87 (m, 1H), 3.82 (d,  $J = 13.63$  Hz, 1H), 3.15 (d,  $J = 12.19$  Hz, 1H), 2.78 (d,  $J = 11.44$  Hz, 1H), 2.44-2.23 (m, 2H), 2.22-2.09 (m, 1H), 1.97-1.87 (m, 1H), 1.72-1.54 (m, 2H), 1.27-1.09 (m, 2H), 0.96 (t,  $J = 7.37$  Hz, 3H)

### sEHI 27

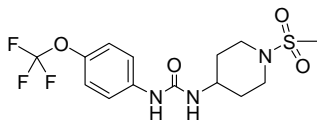

**1-(1-Methanesulfonyl-piperidin-4-yl)-3-(4-trifluoromethoxy-phenyl)-urea**, The desired scaffold (250 mg, 1.3 mmol) and 1 mL of TEA were all combined in 15 mL dichloromethane at 0°C. The reaction was allowed to stir. At this point, methanesulfonyl chloride (1.4 mmol), was added and stirred for 13 hours. The reaction was then washed with  $K_2CO_3(aq)$  (1M, 2 x 10 mL) followed by  $HCl(aq)$  (1M, 2 x 10 mL). The solvent was removed and the residue was chromatographed on silica with 1:1 ethyl acetate:dichloromethane. Recrystallization from acetone afforded the pure product (250 mg, Yield=53%).

$^1H$  NMR (300 MHz,  $CDCl_3$ )  $\delta$  ppm 8.04 (s, 1H), 7.44-7.38 (m, 2H), 7.09 (d,  $J = 8.36$  Hz, 2H), 5.93 (d,  $J = 7.70$  Hz, 1H), 4.00-3.55 (m, 3H), 2.90-2.78 (m, 2H), 2.81 (s, 3H), 2.61-2.55 (m, 2H), 2.15-1.99 (m, 2H), 1.61-1.45 (m, 2H)

### sEHI 29

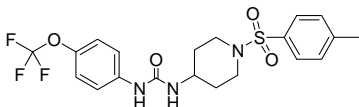

**1-[1-(Toluene-4-sulfonyl)-piperidin-4-yl]-3-(4-trifluoromethoxy-phenyl)-urea**, The desired scaffold (250 mg, 1.3 mmol) and 1 mL of TEA were all combined in 15 mL dichloromethane at 0°C. The reaction was allowed to stir. At this point, 4-methylbenzene-1-sulfonyl chloride (266 mg, 1.4 mmol), was added and stirred for 13 hours. The reaction was then washed with  $K_2CO_3(aq)$  (1M, 2 x 10 mL) followed by  $HCl(aq)$  (1M, 2 x 10 mL). The solvent was removed and the residue was chromatographed on silica with 1:1 ethyl acetate:dichloromethane. Recrystallization from acetone afforded the pure product (297 mg, Yield=52%).

$^1H$  NMR (300 MHz,  $CDCl_3$ )  $\delta$  ppm 7.91 (s, 1H), 7.63 (d,  $J = 8.22$  Hz, 2H), 7.38-7.30 (m, 4H), 7.06 (d,  $J = 8.84$  Hz, 1H), 5.78 (s, 1H), 3.77-3.47 (m, 3H), 2.48-2.35 (m, 2H), 2.44 (s, 3H), 2.05-1.93 (m, 2H), 1.57-1.41 (m, 2H)

### sEHI 30

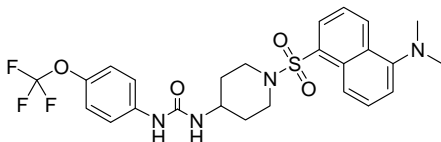

**1-[1-(5-Dimethylamino-naphthalene-1-sulfonyl)-piperidin-4-yl]-3-(4-trifluoromethoxy-phenyl)-urea**, The desired scaffold (200 mg, 0.7 mmol) and 1 mL of TEA were all combined in 15 mL dichloromethane at 0°C. The reaction was allowed to stir. At this point, 5-(dimethylamino)naphthalene-1-sulfonyl chloride (207 mg, 0.77 mmol), was added and stirred for 13 hours. The reaction was then washed with  $K_2CO_3(aq)$  (1M, 2 x 10 mL) followed by  $HCl(aq)$  (1M, 2 x 10 mL). The solvent was removed and the residue was chromatographed on silica with 1:1 ethyl acetate:dichloromethane. Recrystallization from acetone afforded the pure product (338 mg, Yield=93%).

$^1H$  NMR (300 MHz,  $CDCl_3$ )  $\delta$  ppm 8.59 (d,  $J = 8.50$  Hz, 1H), 8.32 (d,  $J = 8.71$  Hz, 1H),

8.18 (dd,  $J = 7.35, 1.19$  Hz, 1H), 7.54 (ddd,  $J = 8.50, 7.51, 3.20$  Hz, 2H), 7.29-7.22 (m, 2H), 7.19 (d,  $J = 7.15$  Hz, 1H), 7.02 (d,  $J = 8.45$  Hz, 2H), 6.93 (s, 1H), 5.19 (d,  $J = 7.73$  Hz, 1H), 3.91-3.64 (m, 3H), 2.89 (s, 6H), 2.86-2.72 (m, 2H), 2.06-1.92 (m, 2H), 1.64-1.46 (m, 2H)

### Synthesis of the cycloheptyl scaffold:

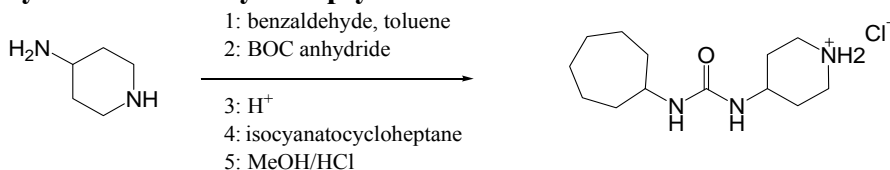

4-Aminopiperidine (4.29 g, 42.8 mmol) was dissolved in toluene (100 mL). To this was added benzaldehyde (4.54 g, 44.6 mmol). The reaction fitted with a Dean-Stark trap and a condenser and was refluxed for 3 hours under an atmosphere of nitrogen. At this point, when no additional water was seen to form, the reaction was cooled to 0 °C and BOC anhydride (9.34g, 42.8 mmol) was added via syringe over 10 minutes. The reaction was allowed to warm to room temperature over 1 hr and was stirred for an additional 17 hrs. The solvent was removed *in vacuo* and the resulting oil was treated with KHSO<sub>4(aq)</sub> (1 M, 42.8 mL). This was stirred for 2 hours. Water (30 mL) and diethylether (50 mL) was added to and stirred for 1.25 hours. The solution was washed with ether. Because of bad emulsion, 50 mL of saturated sodium chloride was added. The solution was then basified with KOH<sub>(s)</sub> (pH = 10) and was extracted with dichloromethane (3 x 100 mL). The organic layer was dried over MgSO<sub>4</sub> and evaporated to give 7.24 g of a yellow/orange oil. To this oil (1.51 g) was added THF (10 mL). This was stirred for 5 minutes until the oil was completely dissolved. The reaction was cooled to 0°C and isocyanatocycloheptane (1.0 ml, 7.55 mmol, 1eq) was added and the reaction stirred overnight under an atmosphere of nitrogen. The solvent was removed and the residue was chromatographed on silica with 1:1 ethylacetate:dichloromethane. The major fraction was collected (2.18 g, 85%). The resultant residue (1.19 g) was treated with a solution of HCl in methanol (15 mL, 1M). This was refluxed for 4 hours. The solvent was removed and the residue was washed with acetone. The major fraction was isolated as white powder (0.833 g).

### *sEHI 31*

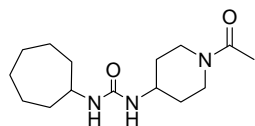

**1-(1-Acetyl-piperidin-4-yl)-3-cycloheptyl-urea.** The desired scaffold (133 mg, 0.48 mmol) and an appropriate carboxylic acid (or ester-acid) (1.1 mmol), and DMAP (58 mg, 0.48 mmol) were all combined in dichloromethane at 0°C. The reaction was allowed to stir for 10 minutes. At this point, EDCI (95 mg, 1.1 mmol) was added and the reaction was allowed to warm to room temperature over 2 hours. After reaching room temperature, the reaction was allowed to stir for 18 hrs. The reaction was then washed with K<sub>2</sub>CO<sub>3(aq)</sub> (1M, 2 x 10 mL) followed by HCl<sub>(aq)</sub> (1M, 2 x 10 mL). The organic layer was dried and evaporated to give a white powder. Recrystallization from acetone afforded the pure product (48 mg, Yield=36%).

<sup>1</sup>H NMR (300 MHz, CDCl<sub>3</sub>) δ ppm 4.68-4.60 (m, 2H), 4.49 (d,  $J = 11.54$  Hz, 1H),

3.92-3.66 (m, 3H), 3.24-3.10 (m, 1H), 2.83-2.71 (m, 1H), 2.11 (s, 3H), 2.08-1.11 (m, 16H)

### *sEH* 32

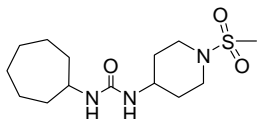

**1-Cycloheptyl-3-(1-methanesulfonyl-piperidin-4-yl)-urea**, The desired scaffold (257 mg, 0.94 mmol) and 1 mL of TEA were all combined in 3 mL dichloromethane at 0°C. The reaction was allowed to stir. At this point, methanesulfonyl chloride (1.2 mmol), was added and stirred for 6 hours. The reaction was then washed with  $K_2CO_3$ (aq) (1M, 2 x 10 mL) followed by  $HCl$ (aq) (1M, 2 x 10 mL). The solvent was removed and the residue was chromatographed on silica with 1:1 ethyl acetate:dichloromethane. Recrystallization from acetone afforded the pure product (176mg, Yield=56%).

$^1H$  NMR (300 MHz,  $CDCl_3$ )  $\delta$  ppm 4.24-4.13 (m, 1H), 4.12-4.01 (m, 1H), 3.85-3.61 (m, 2H), 2.86-2.74 (m, 2H), 2.80 (s, 3H), 2.14-2.02 (m, 2H), 2.00-1.88 (m, 2H), 1.68-1.35 (m, 14H)

### **Preparation of sEH-depleted canine liver cytosol**

Cytosol from canine liver that was depleted in sEH was prepared by binding the sEH selectively to a hydrophobic affinity gel optimized to bind the sEH. Five affinity gels were prepared by similar methods and the one optimized for use with canine cytosol was synthesized following the method. Sepharose CL-6B was washed extensively and successively with water, water/methanol (1:1), and 0.1 M NaOH. To 100 g of moist gel in 200 ml of 0.3 M NaOH, 300 mg of  $NaBH_4$ , and 20 ml of 1,4-butanediol diglycidyl ether were added. The mixture was swirled at room temperature overnight. The epoxy-activated gel was then sequentially and extensively washed with water, methanol/water (1:1), methanol, methanol/water (1:1), and water. To insure that the water used for washing the gel had not become acidic, NaOH was used to insure that the solutions were slightly basic as evaluated by pH test paper. The concentration of free epoxide groups was then evaluated [2]. The gel was synthesized with a ligand density of 10  $\mu$ mol/g of wet gel. A fivefold excess of 4-chlorophenyl thiol in 20 ml of methanol was added to the activated gel in 10 ml of 0.1 M  $NaHCO_3$ . The gel was then gently swirled on a rotating table overnight. After mixing, the derivatized Sepharose was washed extensively and successively with methanol/water (1:1), methanol, methanol/water (1:1), water, 0.5 M NaCl, water, 1 mM HCl, water, and ethanol/water (1:1). The resulting gel was stored at 4°C in absolute ethanol containing 0.1% butylatedhydroxyanisole to reduce oxidation of the thiol ether. To bind canine sEH, 0.5 ml of the gel was used and washed extensively with phosphate buffer. 1 ml of dog liver cytosol was mixed with gel overnight at 4°C. After binding, the unbound cytosol was collected and the gel was washed twice with phosphate buffer. The protein remaining bound on the gel was eluted with 1% SDS solution. The protein concentrations were determined by BCA assay. The sEH activity of unbound cytosol determined with the *t*-DPPO radiolabeled assay was depleted to 13% of the original value. The collected unbound cytosol and eluted binding protein were evaluated by SDS-PAGE.

Table S1 - Optimized conditions for monitoring parent sEH inhibitors by tandem mass spectrometry

| Text # <sup>a</sup> | Compound Laboratory # <sup>b</sup> | Transition | Cone Voltage (V) | Collision Voltage (V) | LOD <sup>c</sup> (ng/mL) | Ref <sup>d</sup> |
|---------------------|------------------------------------|------------|------------------|-----------------------|--------------------------|------------------|
| 1                   | 700                                | 393 → 135  | 28               | 30                    | 1.0                      | [3]              |
| 2                   | 800                                | 449 → 135  | 33               | 29                    | 0.5                      | [4]              |
| 3                   | 950                                | 397 → 220  | 30               | 25                    | 0.7                      | [5]              |
| 4                   | 972                                | 451 → 274  | 35               | 22                    | 0.3                      | [5]              |
| 5                   | 1029                               | 408 → 135  | 45               | 35                    | 0.3                      | [5]              |
| 6                   | 1084                               | 642 → 465  | 30               | 20                    | 0.7                      | [6]              |
| 7                   | 1438                               | 580 → 299  | 12               | 10                    | 1.6                      | [3]              |
| 8                   | 1663                               | 419 → 178  | 25               | 15                    | 5.9                      |                  |
| 9                   | 1664                               | 475 → 224  | 25               | 20                    | 0.3                      |                  |
| 10                  | 1661                               | 403 → 384  | 20               | 18                    | 4.7                      |                  |
| 11                  | 1662                               | 459 → 224  | 22               | 18                    | 0.1                      |                  |
| 12                  | 1659                               | 355 → 216  | 25               | 18                    | 2.6                      |                  |
| 13                  | 1660                               | 411 → 272  | 28               | 20                    | 0.7                      |                  |
| 14                  | 1153                               | 320 → 143  | 18               | 15                    | 0.5                      | [1]              |
| 15                  | 1163                               | 334 → 157  | 19               | 12                    | <0.1                     | [1]              |
| 16                  | 1606                               | 374 → 197  | 22               | 20                    | <0.1                     | [1]              |
| 17                  | 1701                               | 356 → 179  | 18               | 17                    | <0.1                     |                  |
| 18                  | 1702                               | 336 → 159  | 15               | 13                    | <0.1                     |                  |
| 19                  | 1157                               | 348 → 171  | 20               | 15                    | <0.1                     | [1]              |
| 20                  | 1206                               | 406 → 229  | 28               | 20                    | 0.1                      | [1]              |
| 21                  | 1159                               | 382 → 205  | 18               | 10                    | 0.1                      | [1]              |
| 22                  | 1201                               | 383 → 206  | 20               | 20                    | 0.1                      | [1]              |
| 23                  | 1204                               | 440 → 263  | 20               | 15                    | <0.1                     | [1]              |
| 24                  | 1555                               | 346 → 169  | 22               | 15                    | 0.2                      |                  |
| 25                  | 1770                               | 360 → 183  | 22               | 18                    | <0.1                     |                  |
| 26                  | 1771                               | 374 → 197  | 22               | 20                    | <0.1                     |                  |
| 27                  | 1709                               | 382 → 178  | 22               | 18                    | 0.6                      |                  |
| 28                  | 1753                               | 418 → 386  | 20               | 15                    | <0.1                     |                  |
| 29                  | 1711                               | 458 → 281  | 20               | 15                    | 2.0                      |                  |
| 30                  | 1710                               | 537 → 360  | 25               | 20                    | 0.2                      |                  |
| 31                  | 1645                               | 282 → 143  | 18               | 13                    | 0.4                      |                  |
| 32                  | 1748                               | 318 → 179  | 18               | 15                    | <0.1                     |                  |
| 33                  | 981                                | 409 → 275  | 28               | 18                    | 0.7                      | [5]              |
| 34                  | 1061                               | 420 → 135  | 45               | 50                    | 0.8                      | [5]              |
| 35                  | 1565                               | 438 → 135  | 22               | 15                    | 0.1                      |                  |
| 36                  | 1135                               | 387 → 210  | 28               | 15                    | <0.1                     | [7]              |
| 37                  | 1037                               | 419 → 135  | 40               | 30                    | 0.3                      | [7]              |
| 38                  | 1513                               | 438 → 275  | 18               | 14                    | 0.2                      |                  |
| 39                  | 1471                               | 413 → 135  | 40               | 30                    | 0.2                      | [7]              |

Table S1 *continued*

| Compound            |                           | Transition | Cone Voltage<br>(V) | Collision Voltage<br>(V) | LOD<br>(ng/mL) | Ref <sup>c</sup> |
|---------------------|---------------------------|------------|---------------------|--------------------------|----------------|------------------|
| Text # <sup>a</sup> | Laboratory # <sup>b</sup> |            |                     |                          |                |                  |
| 40                  | 1675                      | 413 → 236  | 25                  | 15                       | <0.1           | [7]              |
| 41                  | 1761                      | 413 → 236  | 25                  | 23                       | 1.9            | [7]              |
| 42                  | 1470                      | 441 → 135  | 42                  | 28                       | 0.3            | [7]              |
| 43                  | 1168                      | 473 → 322  | 32                  | 30                       | <0.1           |                  |
| 44                  | 1519                      | 413 → 301  | 24                  | 15                       | 0.2            | [8]              |
| 45                  | 1686                      | 439 → 301  | 25                  | 18                       | 0.9            |                  |
| 46                  | 1615                      | 511 → 178  | 22                  | 15                       | 0.5            |                  |
| 47                  | 1517                      | 397 → 285  | 25                  | 15                       | 0.4            | [8]              |
| 48                  | 1515                      | 349 → 210  | 23                  | 15                       | 0.2            | [8]              |
| 49                  | 1193                      | 329 → 135  | 35                  | 25                       | <0.1           |                  |
| 50                  | 1443                      | 409 → 135  | 38                  | 25                       | 0.4            |                  |
| 51                  | 1444                      | 381 → 135  | 35                  | 25                       | <0.1           |                  |
| 52                  | 1026                      | 403 → 135  | 35                  | 25                       | 1.2            | [5]              |
| 53                  | 1622                      | 457 → 135  | 42                  | 33                       | 0.3            | [5]              |
| 54                  | 1425                      | 662 → 485  | 30                  | 22                       | 1.5            | [6]              |
| 55                  | 1183                      | 287 → 135  | 35                  | 25                       | <0.1           | [5]              |
| 56                  | 1647                      | 301 → 135  | 35                  | 25                       | 0.4            | [9]              |
| 57                  | 1648                      | 355 → 135  | 35                  | 20                       | 2.7            |                  |
| 58                  | 1650                      | 387 → 135  | 35                  | 20                       | 6.2            |                  |
| 59                  | 1195                      | 363 → 135  | 32                  | 25                       | 0.3            | [9]              |
| 60                  | 1222                      | 391 → 135  | 35                  | 25                       | 0.7            | [9]              |
| 61                  | 1849                      | 449 → 287  | 30                  | 20                       | <0.1           | [9]              |
| 62                  | 1671                      | 345 → 135  | 30                  | 25                       | 0.7            | [9]              |
| 63                  | 1672                      | 331 → 135  | 30                  | 22                       | 4.1            | [9]              |
| 64                  | 1197                      | 400 → 135  | 45                  | 32                       | <0.1           | [5]              |
| 65                  | 1167                      | 356 → 205  | 42                  | 28                       | <0.1           | [9]              |
| 66                  | 1179                      | 384 → 135  | 30                  | 15                       | <0.1           | [9]              |
| 67                  | 1180                      | 467 → 135  | 45                  | 30                       | <0.1           | [9]              |
| 68                  | 1618                      | 503 → 135  | 45                  | 35                       | 0.6            |                  |
| 69                  | 1774                      | 371 → 178  | 22                  | 20                       | 6.0            |                  |
| 70                  | 1775                      | 357 → 136  | 25                  | 22                       | 4.2            |                  |
| 71                  | 1064                      | 292 → 135  | 40                  | 35                       | 0.3            | [10]             |
| 72                  | 1642                      | 319 → 143  | 25                  | 20                       | <0.1           | [1]              |
| 73                  | 1644                      | 373 → 135  | 25                  | 20                       | <0.1           | [1]              |

<sup>a</sup> text numbers of sEH inhibitors.

<sup>b</sup> laboratory numbers of sEH inhibitors.

<sup>c</sup> limit of detection.

<sup>d</sup> published reference for previously published compounds.



Table S2 – HPLC gradient of EETs/diols analysis

| Time<br>(min) | B <sup>a</sup><br>(%) |
|---------------|-----------------------|
| 0             | 15                    |
| 0.5           | 15                    |
| 0.6           | 55                    |
| 4             | 80                    |
| 4.1           | 98                    |
| 5             | 98                    |
| 5.1           | 15                    |
| 6             | 15                    |

<sup>a</sup> organic solvent (methanol: acetonitrile: acetic acid=15:85:0.1) concentration of the gradient.

Table S3 - Chemical structures and IC<sub>50</sub> and AUC of the sEH inhibitors

| Text # | Structure | Human sEH IC <sub>50</sub> <sup>a</sup> (nM) | Canine AUC <sup>b</sup> (μM*min)         |
|--------|-----------|----------------------------------------------|------------------------------------------|
| 1      |           | 3.2                                          | 3.1                                      |
| 2      |           | 0.8                                          | <LOD <sup>c</sup><br>(14.3) <sup>d</sup> |
| 3      |           | 14.1                                         | 2.4                                      |
| 4      |           | 1.4                                          | 0.6                                      |
| 5      |           | 9.0                                          | <LOD                                     |
| 6      |           | 2.5                                          | <LOD                                     |
| 7      |           | 5.1                                          | <LOD                                     |
| 8      |           | 7.3                                          | 8.9                                      |
| 9      |           | 2.4                                          | <LOD<br>(<LOD)                           |
| 10     |           | 5.9                                          | <LOD                                     |

Table S3 *continued*

| Text # | Structure                                                                           | Human sEH IC <sub>50</sub> <sup>a</sup> (nM) | Canine AUC <sup>b</sup> (μM*min) |
|--------|-------------------------------------------------------------------------------------|----------------------------------------------|----------------------------------|
| 11     | 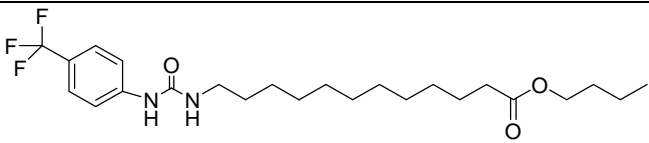   | 2.1                                          | <LOD (<LOD)                      |
| 12     |    | 3.9                                          | 1.7                              |
| 13     |    | 0.8                                          | <LOD (10.5)                      |
| 14     |    | 14.5                                         | 36                               |
| 15     |    | 3.2                                          | 5.6                              |
| 16     |   | 1.7                                          | 2.6                              |
| 17     |  | 1.4                                          | 4.9                              |
| 18     |  | 0.9                                          | 5.4                              |
| 19     |  | 2.6                                          | 2.6                              |
| 20     |  | 2.7                                          | <LOD (<LOD)                      |

Table S3 *continued*

| Text # | Structure                                                                           | Human sEH IC <sub>50</sub> <sup>a</sup><br>(nM) | Canine AUC <sup>b</sup><br>(μM*min) |
|--------|-------------------------------------------------------------------------------------|-------------------------------------------------|-------------------------------------|
| 21     | 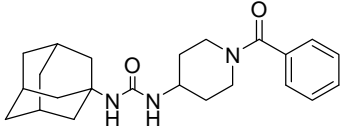   | 1.3                                             | <LOD                                |
| 22     |    | 1.2                                             | 4.8                                 |
| 23     |    | 1.1                                             | <LOD                                |
| 24     |    | 11.5                                            | 390                                 |
| 25     |    | 3.7                                             | 600                                 |
| 26     |   | 2.1                                             | 260                                 |
| 27     |  | 2.9                                             | 1700                                |
| 28     |  | 10.2                                            | <LOD<br>(<LOD)                      |
| 29     |  | 0.4                                             | <LOD                                |
| 30     |  | 0.8                                             | <LOD                                |

Table S3 *continued*

| Text # | Structure                                                                           | Human sEH IC <sub>50</sub> <sup>a</sup><br>(nM) | Canine AUC <sup>b</sup><br>(μM*min) |
|--------|-------------------------------------------------------------------------------------|-------------------------------------------------|-------------------------------------|
| 31     | 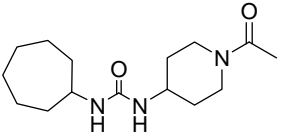   | 27.6                                            | 220                                 |
| 32     |    | 2.3                                             | 160                                 |
| 33     |    | 1.6                                             | 2.0                                 |
| 34     |    | 1.8                                             | 8.0                                 |
| 35     |    | 6.6                                             | <LOD                                |
| 36     |   | 0.4                                             | 1.2                                 |
| 37     |  | 0.4                                             | <LOD                                |
| 38     |  | 4.8                                             | 13.7                                |
| 39     |  | 1.5                                             | 240                                 |
| 40     |  | 1.3                                             | 290                                 |

Table S3 *continued*

| Text # | Structure | Human sEH IC <sub>50</sub> <sup>a</sup><br>(nM) | Canine AUC <sup>b</sup><br>(μM*min) |
|--------|-----------|-------------------------------------------------|-------------------------------------|
| 41     |           | 8.1                                             | 17.4                                |
| 42     |           | 3.8                                             | 4.0<br>(60.0)                       |
| 43     |           | 6.1                                             | <LOD                                |
| 44     |           | 1.4                                             | 29.8                                |
| 45     |           | 0.6                                             | 240                                 |
| 46     |           | 2.8                                             | 0.7                                 |
| 47     |           | 1.2                                             | 31.2                                |
| 48     |           | 0.4                                             | 19.2                                |
| 49     |           | 5.8                                             | <LOD<br>(<LOD)                      |
| 50     |           | 0.8                                             | <LOD<br>(0.2)                       |

Table S3 *continued*

| Text # | Structure                                                                           | Human sEH IC <sub>50</sub> <sup>a</sup><br>(nM) | Canine AUC <sup>b</sup><br>(μM*min) |
|--------|-------------------------------------------------------------------------------------|-------------------------------------------------|-------------------------------------|
| 51     | 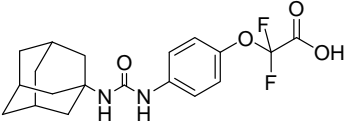   | 11.6                                            | <LOD                                |
| 52     |    | 1.8                                             | 10.2                                |
| 53     |    | 3.3                                             | 6.7                                 |
| 54     |    | 11.3                                            | <LOD                                |
| 55     |   | 23.6                                            | <LOD                                |
| 56     |  | 4.7                                             | 5.9                                 |
| 57     |  | 3.1                                             | 5.1                                 |
| 58     |  | 1.5                                             | 1.4                                 |
| 59     |  | 0.9                                             | <LOD                                |
| 60     |  | 5.1                                             | <LOD<br>(<LOD)                      |

Table S3 *continued*

| Text # | Structure | Human sEH IC <sub>50</sub> <sup>a</sup><br>(nM) | Canine AUC <sup>b</sup><br>(μM*min) |
|--------|-----------|-------------------------------------------------|-------------------------------------|
| 61     |           | 0.8                                             | <LOD<br>(<LOD)                      |
| 62     |           | 2.8                                             | 12.6<br>(<LOD)                      |
| 63     |           | 71.4                                            | <LOD                                |
| 64     |           | 0.9                                             | 11.3                                |
| 65     |           | 5.2                                             | <LOD                                |
| 66     |           | 24.6                                            | <LOD                                |
| 67     |           | 28.7                                            | <LOD                                |
| 68     |           | 13.6                                            | <LOD                                |
| 69     |           | 12.2                                            | 8.5<br>(<LOD)                       |
| 70     |           | 94.6                                            | <LOD                                |



Table S3 *continued*

| Text # | Structure                                                                         | Human sEH IC <sub>50</sub> <sup>a</sup><br>(nM) | Canine AUC <sup>b</sup><br>(μM*min) |
|--------|-----------------------------------------------------------------------------------|-------------------------------------------------|-------------------------------------|
| 71     | 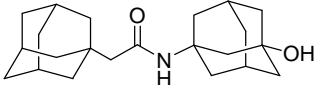 | 39.9                                            | <LOD                                |
| 72     |  | 275                                             | 5.8                                 |
| 73     |  | 28.3                                            | <LOD                                |
| 74     |  | 13                                              | 1.8                                 |

<sup>a</sup> IC<sub>50</sub> determined by fluorescent assay with recombinant human enzyme. Caution, this assay over estimates the potency of piperidines on the sEH by 10-20x relative to other series of sEH.

<sup>b</sup> area under the curve, AUC (Time<sub>0-infinite</sub>).

<sup>c</sup> below the limit of detection.

<sup>d</sup> area under the blood concentration vs time AUC of the corresponding carboxylic acids (Time<sub>0-infinite</sub>).

Table S4 – Balance sheet for the preparation of sEH-depleted dog liver cytosol

|              | Protein<br>conc.<br>(mg/ml) | Total<br>protein<br>(mg) <sup>a</sup> | Specific<br>activity<br>(nmol/min/mg) | Total activity<br>(nmol/min) | Activity<br>remaining<br>(%) |
|--------------|-----------------------------|---------------------------------------|---------------------------------------|------------------------------|------------------------------|
| Crude        | 25                          | 25                                    | 3.3                                   | 83.3                         | 100                          |
| sEH-depleted | 19                          | 19                                    | 0.6                                   | 11.2                         | 13                           |

<sup>a</sup> in interpreting this experiment, it is possible that a factor reducing the potency of piperidine compounds remained bound to the column.

<sup>b</sup> the depletion of sEH coupled with the low specific activity of canine cytosol allowed the high amounts of canine cytosol to be added with the human sEH without a major contribution from the canine sEH to the total enzyme activity.

Table S5 – IC<sub>50</sub> of inhibitors with human recombinant sEH in buffer, dog liver cytosol, or sEH-depleted dog liver cytosol using a *t*-DPPO based radiotracer assay

| sEHI                  | #         | Buffer <sup>a</sup> | Dog liver cytosol <sup>b</sup> | Dog liver cytosol<br>sEH depleted <sup>c</sup> |
|-----------------------|-----------|---------------------|--------------------------------|------------------------------------------------|
| IC <sub>50</sub> (nM) |           |                     |                                |                                                |
| TUPS                  | <b>27</b> | 120                 | 120                            | 150                                            |
| <i>t</i> -AUCB        | <b>39</b> | 2                   | 3                              | 2                                              |

<sup>a</sup> measured with purified recombinant enzyme with a sEH protein concentration of 0.12 µg/ml.

<sup>b</sup> measured with dog liver cytosolic preparation at a protein concentration of 0.025 supplemented with purified recombinant human enzyme (0.12 µg/ml). The sEH activity remaining in the dog liver cytosol accounted for under 17% of the total activity in the assay.

<sup>c</sup> measured with dog liver cytosolic preparation at a protein concentration of 0.19 mg/ml supplemented with purified recombinant human enzyme (0.12 µg/ml). The sEH remaining in the depleted dog liver cytosol accounted for under 13% of the total activity in the assay.

Table S6 – IC<sub>50</sub> of inhibitors with piperidyl and non-piperidyl linker with 14, 15-EET by LC/MS-MS

| #             | Human recombinant sEH <sup>a</sup> |    | Human liver cytosol <sup>b</sup> |    | Dog liver cytosol <sup>c</sup> |      |
|---------------|------------------------------------|----|----------------------------------|----|--------------------------------|------|
|               | IC <sub>50</sub> (nM)              |    |                                  |    |                                |      |
| <b>[S] μM</b> | 5                                  | 50 | 5                                | 50 | 5                              | 50   |
| <b>27</b>     | 33                                 | 40 | 18                               | 26 | 1200                           | 1500 |
| <b>39</b>     | 4                                  | 5  | 2                                | 3  | 7                              | 7    |

<sup>a</sup> measured with purified recombinant enzyme at protein concentration of 0.12 μg/ml.

<sup>b</sup> measured with liver cytosolic preparation at protein concentration of 0.05 mg/ml.

<sup>c</sup> measured with liver cytosolic preparation at protein concentration of 0.2 mg/ml.

Table S7 - Compartmental pharmacokinetic parameters of *t*-AUCB after oral gavage at doses of 0.1, 0.3 and 1 mg/kg in dogs (n = 3)

| Dose | Compartment | Correlation | C <sub>max</sub> <sup>a</sup><br>(nM) | T <sub>1/2</sub> <sup>b</sup><br>(h) | AUC <sup>c</sup><br>(μM*min) |
|------|-------------|-------------|---------------------------------------|--------------------------------------|------------------------------|
| 0.03 | 1           | 0.77± 0.11  | 0.011 ± 0.004                         | 6 ± 3                                | 8.3 ± 0.2                    |
| 0.1  | 1           | 0.72 ± 0.03 | 0.05 ± 0.04                           | 6 ± 3                                | 34 ± 25                      |
| 0.3  | 1           | 0.96 ± 0.04 | 0.15 ± 0.03                           | 12 ± 10                              | 270 ± 100                    |
| 1    | 1           | 0.94 ± 0.01 | 0.55 ± 0.22                           | 9 ± 4                                | 1300 ± 750                   |

<sup>a</sup> maximum concentration.

<sup>b</sup> terminal half life.

<sup>c</sup> area under the concentration (Time<sub>0-24 h</sub>).

Table S8 – Plasma levels of epoxides and diols derived from arachidonic acids at 30 minutes following oral administration of *t*-AUCB **39** at an oral dose of 0.1, 0.3, and 1 mg/kg body weight.

| Dose<br>(mg/kg) | 5, 6-EET | 8, 9-EET   | 11, 12-EET | 14, 15-EET  | 5, 6-DHET<br>(nM) | 8, 9-DHET   | 11, 12,-DHET | 14, 15-DHET |
|-----------------|----------|------------|------------|-------------|-------------------|-------------|--------------|-------------|
| 0               | 27 ± 11  | 7.6 ± 3.7  | 7.9 ± 6.4  | 16.5 ± 7.9  | 31 ± 15           | 13.4 ± 6.1  | 13.1 ± 3.2   | 11.1 ± 2.1  |
| 0.1             | 9 ± 4    | 3.0 ± 1.2  | 3.1 ± 1.5  | 5.4 ± 2.5   | 9 ± 6             | 3.4 ± 1.8   | 5.9 ± 3.8    | 4.4 ± 3.0   |
| 0.3             | 15 ± 3   | 6.8 ± 1.9  | 9.0 ± 1.5  | 11.2 ± 2.6  | 20 ± 7            | 4.5 ± 2.0   | 6.5 ± 1.9    | 3.7 ± 1.4   |
| 1               | 59 ± 31  | 10.8 ± 5.5 | 22.7 ± 3.9 | 37.2 ± 17.6 | 58 ± 16           | 22.2 ± 10.3 | 16.5 ± 3.9   | 10.3 ± 3.5  |

Table S9 - Non-compartmental pharmacokinetic parameters of *t*-AUCB **39** after oral administration at a 0.3 mg/kg dose in different formulations (n = 3)

|                         | $C_{\max}^a$<br>(nM) | $AUC_t^b$<br>( $\mu\text{M}\cdot\text{hr}$ ) |
|-------------------------|----------------------|----------------------------------------------|
| Triglyceride Solution   | 99                   | 2.5                                          |
| Saline Solution         | 170±55               | 2.7±0.6                                      |
| Dry Powder              | 41±45                | 0.5±0.8                                      |
| Dry Powder/HPMC/Lactose | 67±32                | 0.6±0.3                                      |

<sup>a</sup> maximum concentration.

<sup>b</sup> area under the curve (Time<sub>0-24</sub>).

<sup>c</sup> the variation represents variation among data from individual dogs.

Table S10 - Compartmental pharmacokinetic parameters of sEHIs between cassette and individual dosing after oral gavage at a 0.3 mg/kg dose in dogs (n = 3)

| #         | Acronym        | Dosing     | T <sub>max</sub> <sup>a</sup><br>(h) | C <sub>max</sub> <sup>b</sup><br>(μM) | T <sub>1/2</sub> <sup>c</sup><br>(h) | AUC <sup>d</sup><br>(μM*min) |
|-----------|----------------|------------|--------------------------------------|---------------------------------------|--------------------------------------|------------------------------|
| <b>3</b>  | AEPU           | Cassette   | 0.4                                  | 0.03                                  | 1.2                                  | 2.2                          |
|           |                | Individual | 0.2 ± 0.1                            | 0.02 ± 0.01                           | 1.7 ± 1.0                            | 1.8 ± 0.6                    |
| <b>14</b> | APAU           | Cassette   | 0.4                                  | 0.3                                   | 1.1                                  | 35                           |
|           |                | Individual | 1.0 ± 0.7                            | 0.08 ± 0.03                           | 1.7 ± 0.4                            | 14 ± 1                       |
| <b>39</b> | <i>t</i> -AUCB | Cassette   | 2.4                                  | 0.1                                   | 18                                   | 220                          |
|           |                | Individual | 7.3 ± 5.4                            | 0.15 ± 0.03                           | 12 ± 10                              | 270 ± 100                    |

<sup>a</sup> time of maximum concentration.

<sup>b</sup> maximum concentration.

<sup>c</sup> terminal half life.

<sup>d</sup> area under the concentration (Time<sub>0-24 h</sub>).



Fig. S1 - Structures of the substrate for the fluorescent assay, CMNPC; substrate for the radiochemical assay, *t*-DPPO; and substrate for the LC/MS based assay, 14, 15-EET. The fluorescent, radiolabeled and LC/MS based assays are all valuable as sensitive screens for sEH inhibitors *in vitro* [11]. Due to the high-throughput capability of fluorescent assay and comparability to other assays, CMNPC was preferred for screening sEH inhibitors [12]. However, it is difficult to compare IC<sub>50</sub>s between assays due to different substrate affinities and concentrations, and enzyme concentrations among assays. In the previous study [13], IC<sub>50</sub> values of previous inhibitors were 1-10 fold higher in the radiolabeled assay than in the fluorescent assay but the values were highly predictable ( $r^2=0.86$ ). In this study, it is observed that the IC<sub>50</sub> values of inhibitors with piperidyl linker is 10-20 fold higher while the values of the others are 1-3 fold higher in the radiolabeled assay. Although the ranking of compounds are still predictable ( $r^2=0.78$ ) A serious caution is that potencies of compounds with a piperidyl linker are over estimated by this CMNPC assay possibly due to the lower affinity of the fluorescent substrate. As IC<sub>50</sub> values approach 1 nanomolar, the ability of the assay to rank potency decreases. As currently formulated all highly potent compounds will have an IC<sub>50</sub> in the fluorescent assay of 0.5 nM. Thus, it is possible that the potencies of compounds with an IC<sub>50</sub> below 2 nanomolar, particularly those with a cyclohexyl ether linker are under estimated. Thus, more sensitive binding assays are needed to determine IC<sub>50</sub>s of those potent inhibitors.

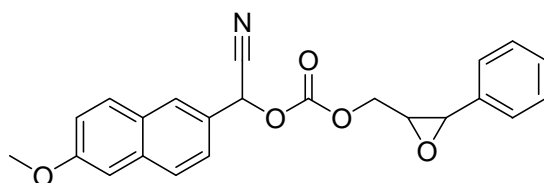

**CMNPC**

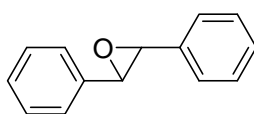

***t*-DPPO**

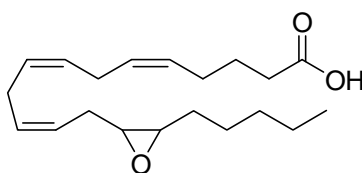

**14, 15-EET**

Fig. S2- Plasma concentration-time profiles of sEH inhibitors following an oral dose of 0.3 mg/kg. For clarity the compounds are grouped according to their C<sub>max</sub> values. The maximum plasma concentration of inhibitors over 300 nM (a); 150 nM (b); 50 nM (c); 40 nM (d); 25 nM (e and f); 15 nM (g); 10 nM (h); and 2 nM (i). The legend refers to the number used in the text, a laboratory number used in previous publications, and an acronym used in the literature (ie #27-1709(TUPS)). The inhibitors are divided into four groups including a alkyl, a piperidyl, a cyclohexyl, or a benzyl linker (right side of the urea) and four sub-groups including an adamantyl, a 4-trifluoromethoxyphenyl, a 4-trifluoromethylphenyl, or a cycloheptyl group (left side of the urea). Among compounds with the piperidyl linker, inhibitors with a 4-trifluoromethoxyphenyl group have the highest oral exposure with different functional groups on the right side of urea (a) followed by inhibitors with a cycloheptyl group (a & b). The adamantane left side was used in earlier studies because of its high potency and very high sensitivity on LC-MS. However, the adamantane tends to give lower blood levels and shorter half-lives than the 4-trifluoromethoxyphenyl and cycloheptyl group particularly as right side groups become more lipophilic. The cyclohexyl linker moiety also shows good oral exposure (c & d). However, within this linker, the non-polar groups on the left side of urea have less effect on the plasma level. Most inhibitors with the alkyl or benzyl linker have less oral exposure (e, f, g, h & i). Furthermore, many inhibitors with the alkyl or benzyl linker were not detected in plasma. Each point represents one dog. Standard deviation of the repeated injection of the same sample is 5-10% of the reported value and the standard deviation of extraction and workup of the same sample is 10-30% of the reported value.

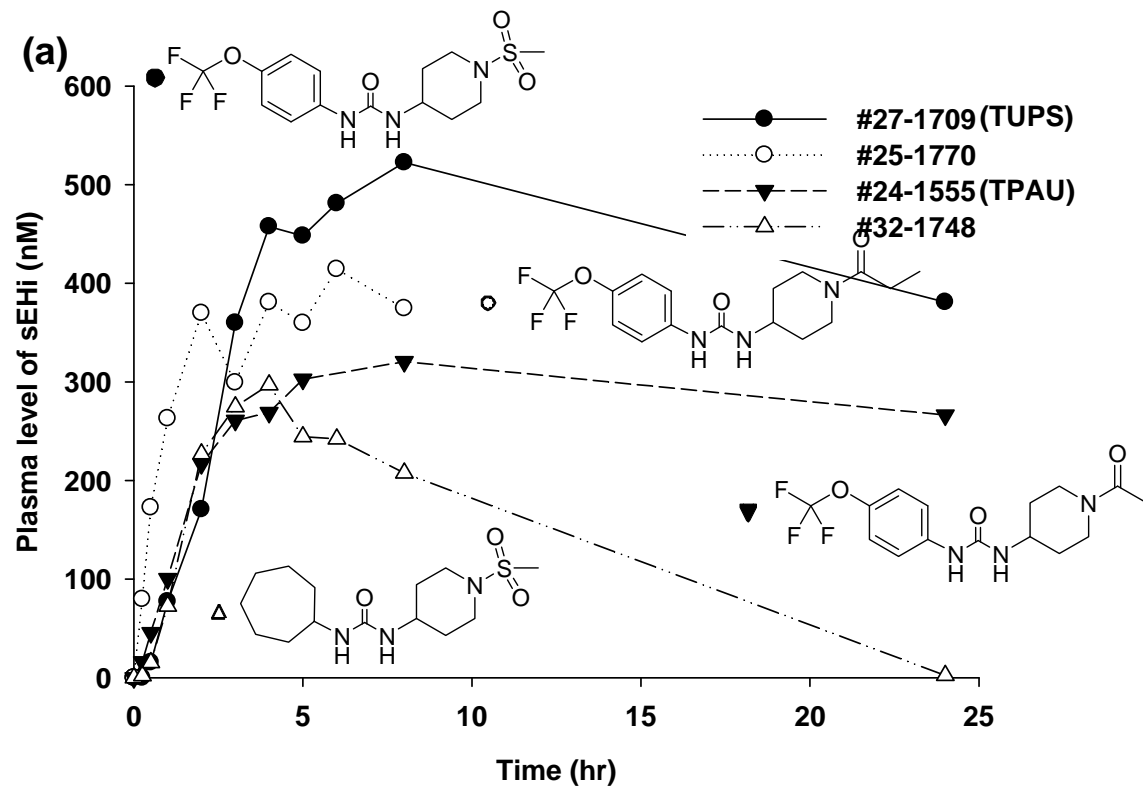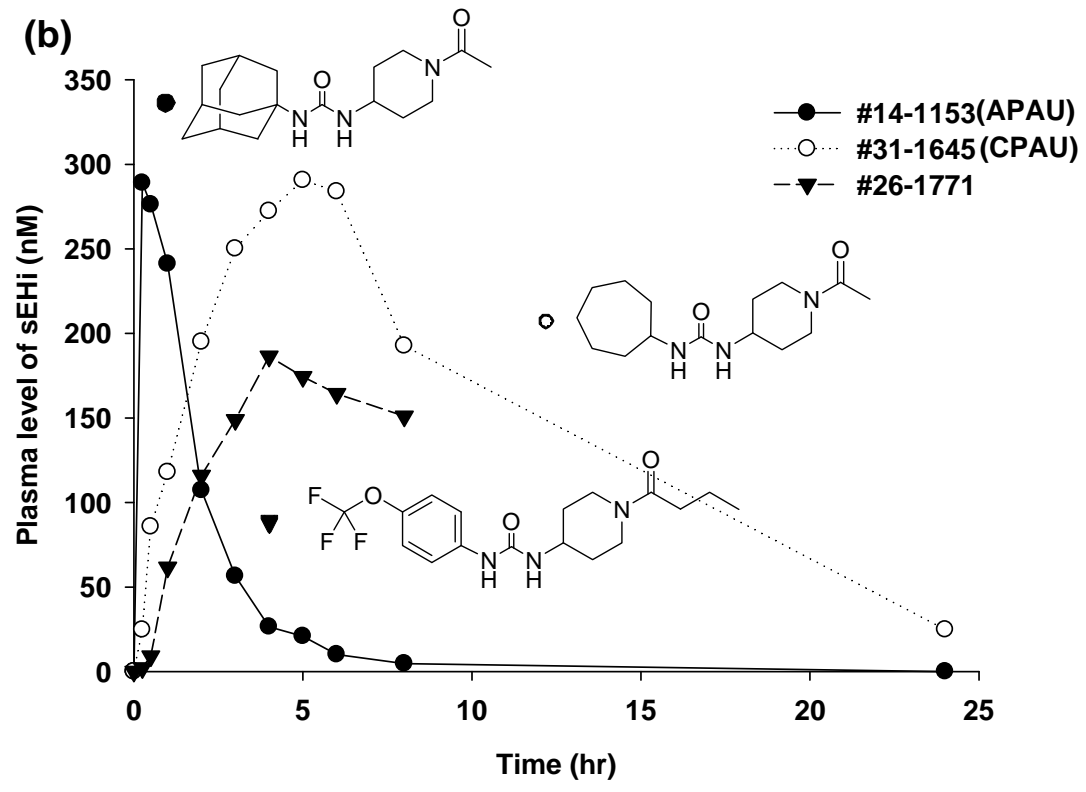

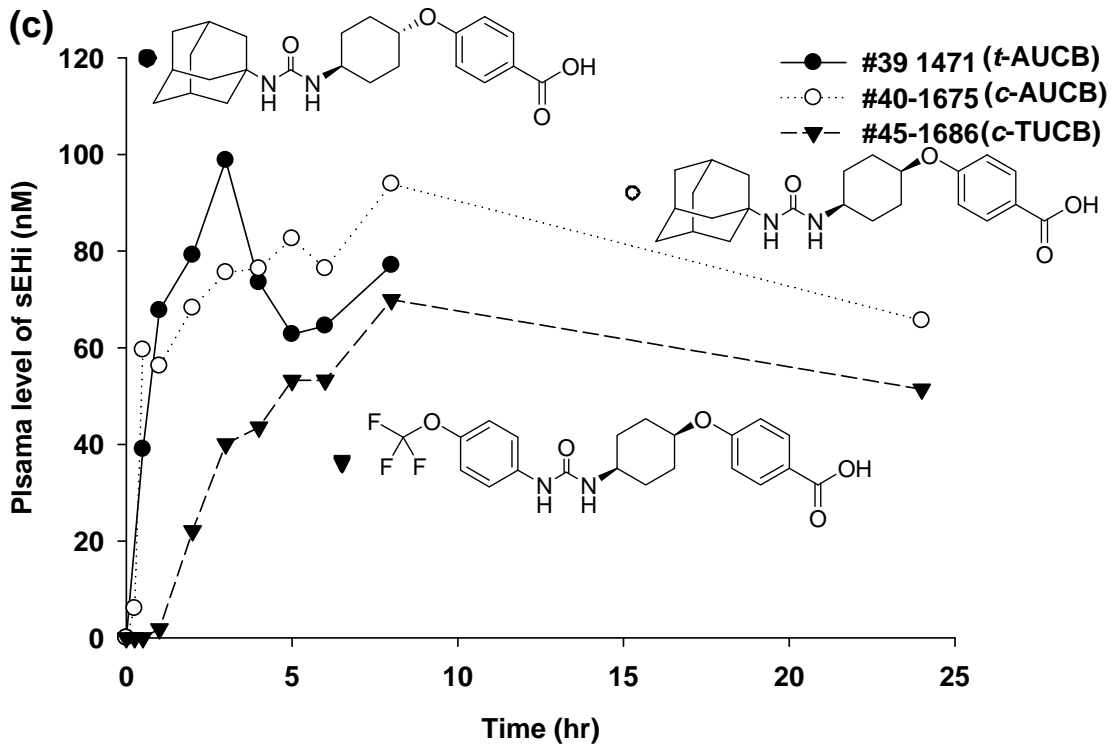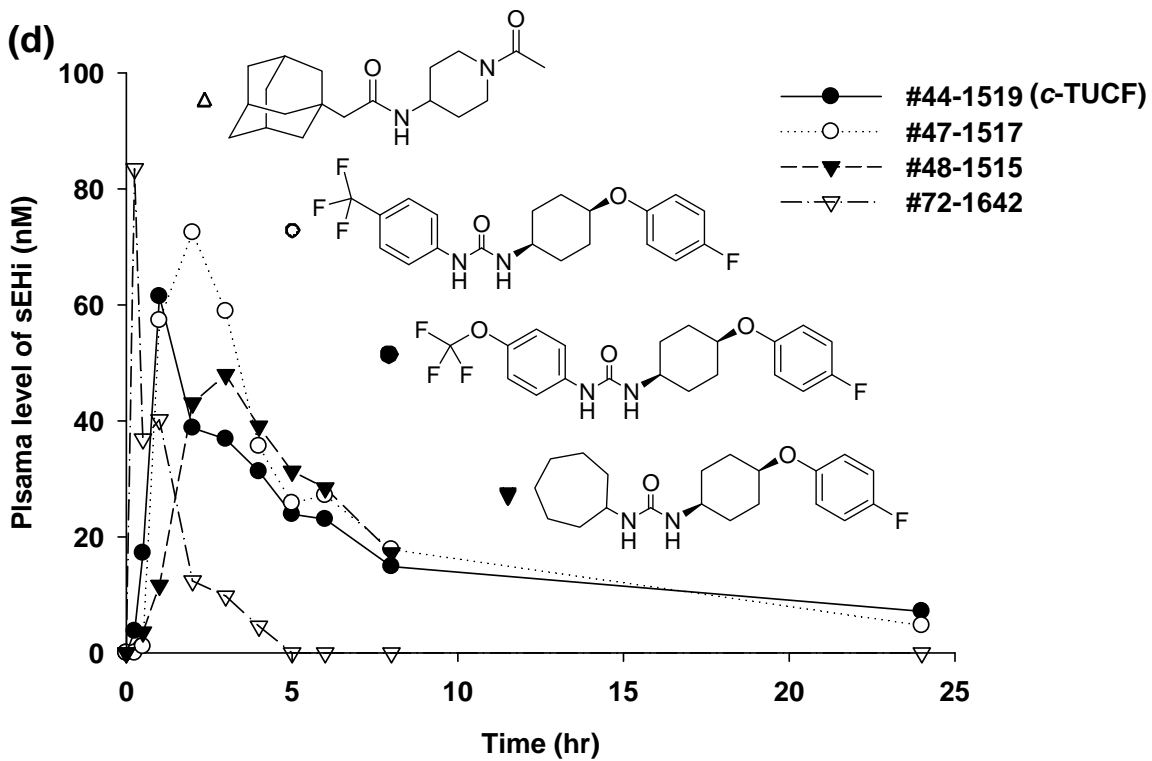

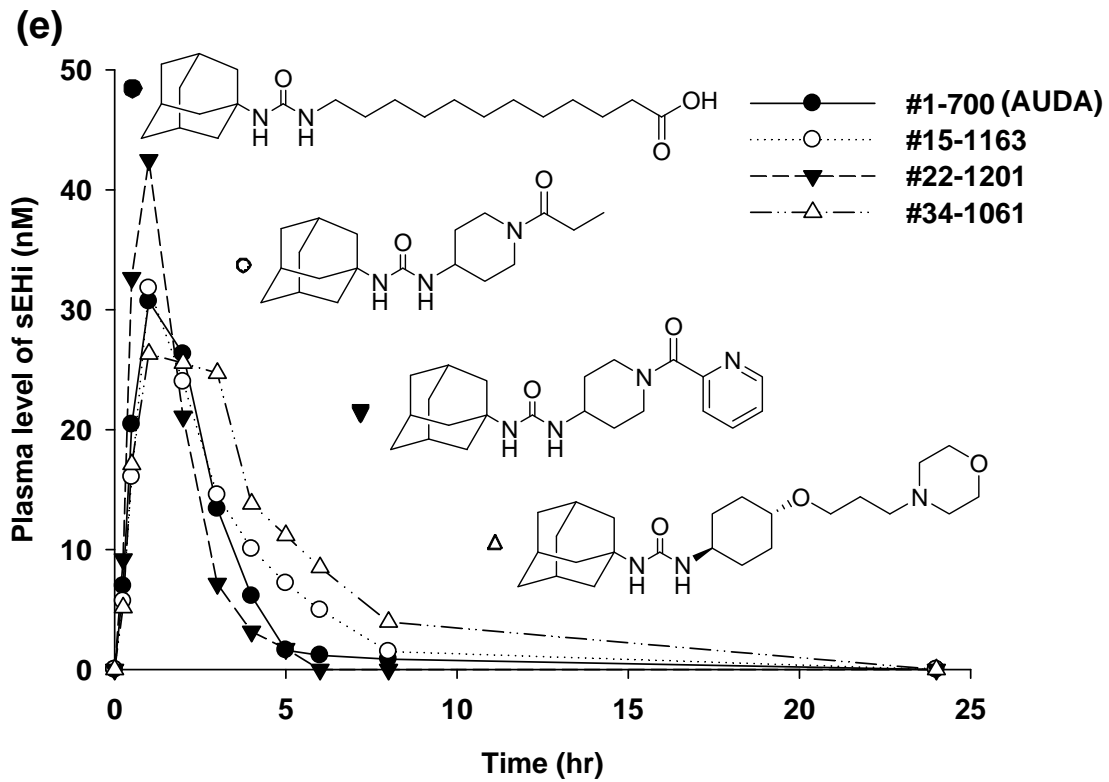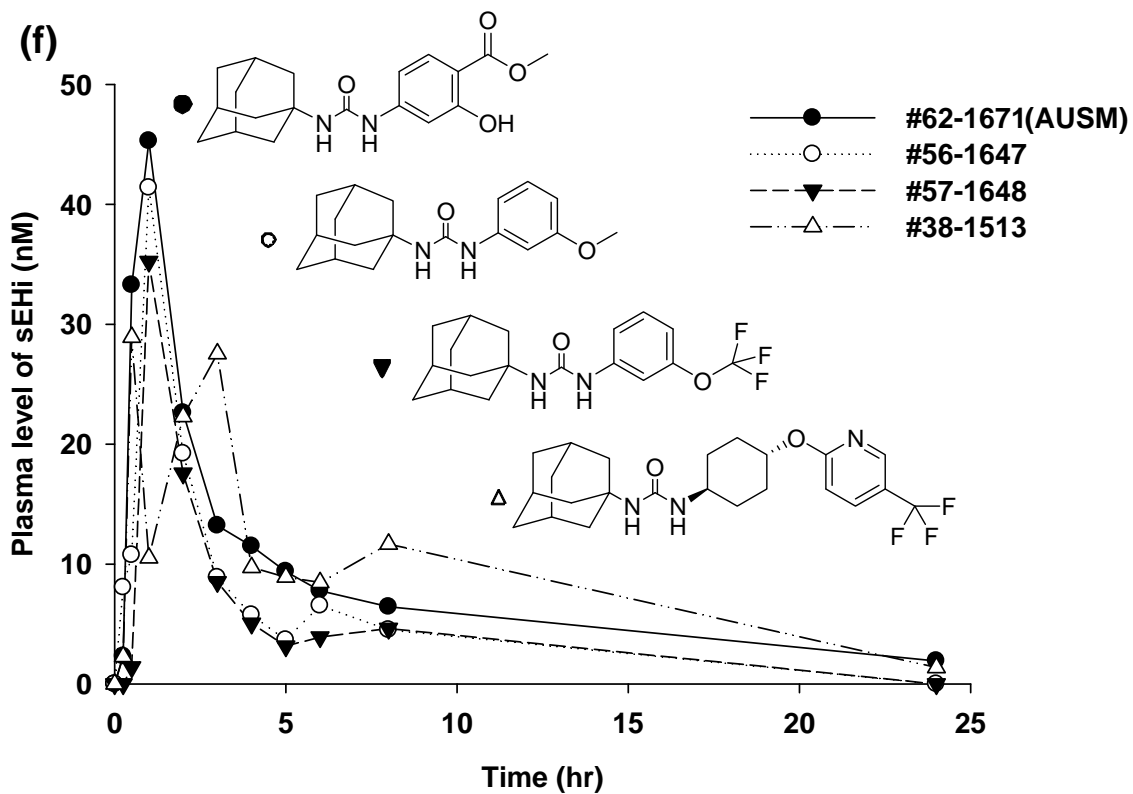

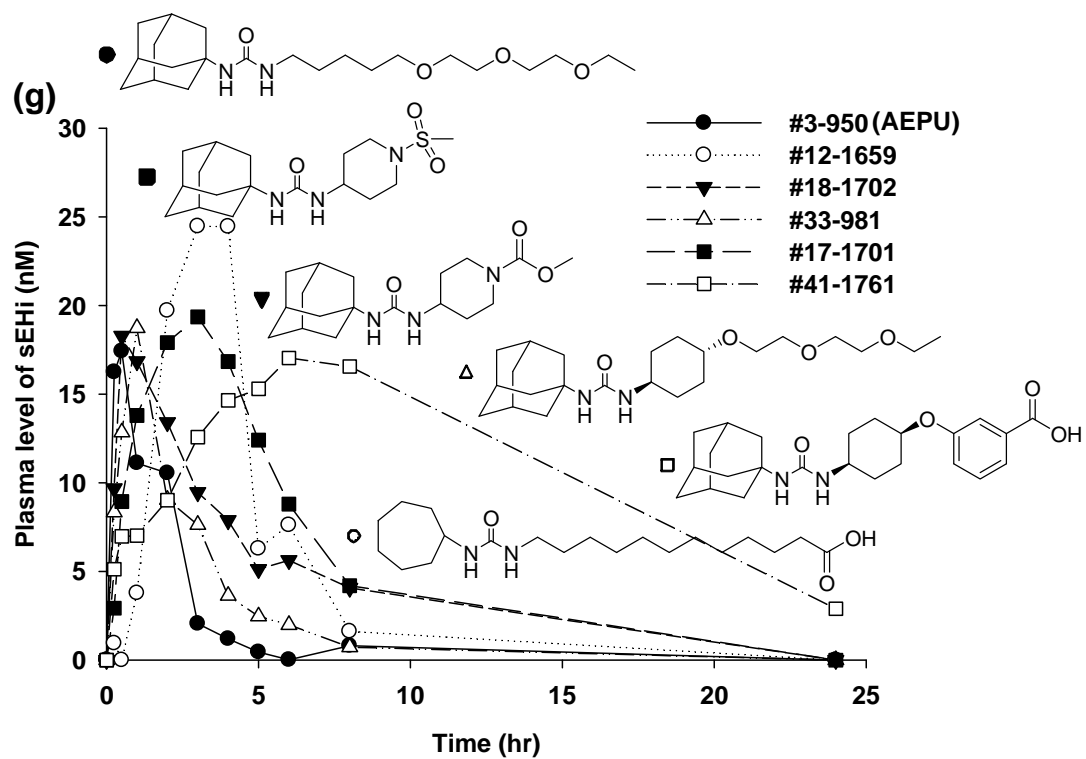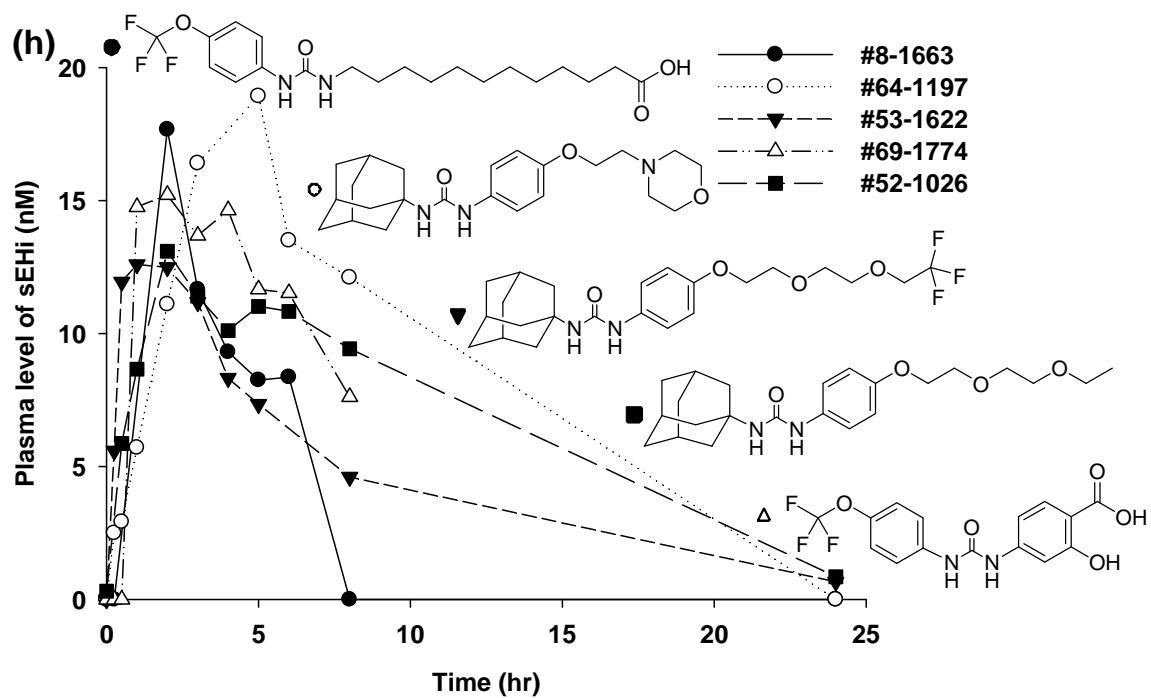

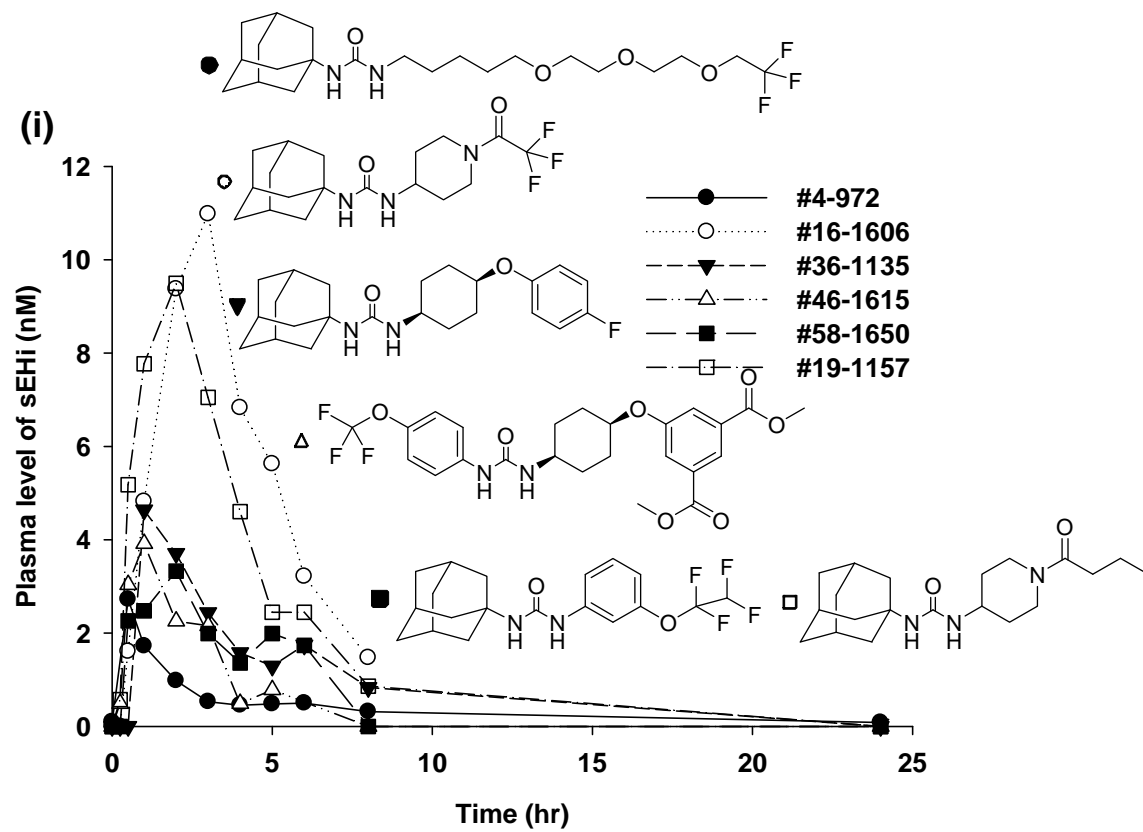

Fig. S3 – SDS-PAGE of sEH-depleted dog liver cytosol. M: standard marker; C: crude cytosol (1  $\mu\text{g}/\text{well}$ ); U: unbound cytosol (10  $\mu\text{g}/\text{well}$ ); E: 1% SDS elution (4  $\mu\text{g}/\text{well}$ ).

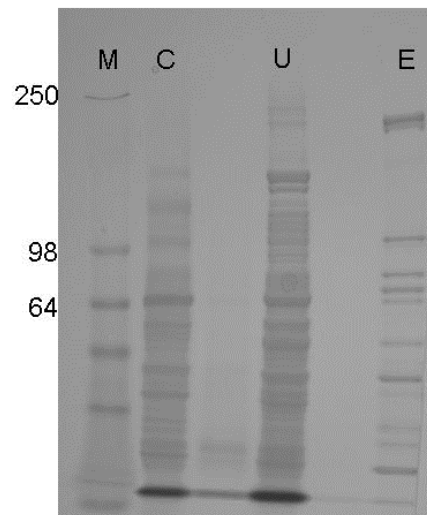



Fig. S4 - Ratios of epoxides and diols vs. dose of t-AUCB 39 at 30 minutes post an oral dose of 0.1, 0.3, and 1 mg/kg body weight approaching linearity ( $R^2 = 0.04$ ). Each datum point represents one dog. The curve approaches linearity with  $R^2=0.04$ . These data show that epoxide to diol ratio is of limited value in showing target engagement with dogs not suffering from inflammation. This ratio has proven a valuable indicator of target engagement in other species particularly when in an inflammatory condition.

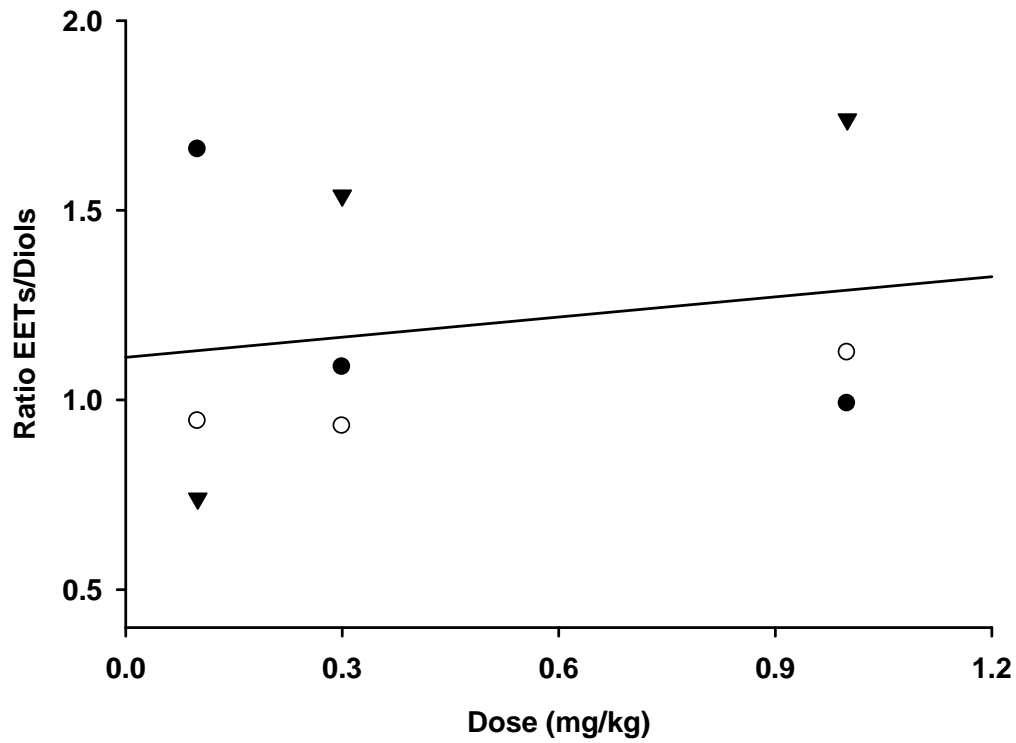

## References

1. Jones, P.D., et al., *Synthesis and SAR of conformationally restricted inhibitors of soluble epoxide hydrolase*. *Bioorg Med Chem Lett*, 2006. **16**(19): p. 5212-6.
2. Wixtrom, R.N., M.H. Silva, and B.D. Hammock, *Affinity purification of cytosolic epoxide hydrolase using derivatized epoxy-activated Sepharose gels*. *Anal Biochem*, 1988. **169**(1): p. 71-80.
3. Kim, I.H., et al., *Design of bioavailable derivatives of 12-(3-adamantan-1-yl-ureido)dodecanoic acid, a potent inhibitor of the soluble epoxide hydrolase*. *Bioorg Med Chem*, 2007. **15**(1): p. 312-23.
4. Kim, I.H., et al., *Design, synthesis, and biological activity of 1,3-disubstituted ureas as potent inhibitors of the soluble epoxide hydrolase of increased water solubility*. *J Med Chem*, 2004. **47**(8): p. 2110-22.
5. Kim, I.H., et al., *1,3-disubstituted ureas functionalized with ether groups are potent inhibitors of the soluble epoxide hydrolase with improved pharmacokinetic properties*. *J Med Chem*, 2007. **50**(21): p. 5217-26.
6. Morisseau, C., et al., *Peptidyl-urea based inhibitors of soluble epoxide hydrolases*. *Bioorg Med Chem Lett*, 2006. **16**(20): p. 5439-44.
7. Hwang, S.H., et al., *Orally bioavailable potent soluble epoxide hydrolase inhibitors*. *J Med Chem*, 2007. **50**(16): p. 3825-40.
8. Hwang, S.H., et al., *Solid-phase combinatorial approach for the optimization of soluble epoxide hydrolase inhibitors*. *Bioorg Med Chem Lett*, 2006. **16**(22): p. 5773-7.
9. Kasagami, T., et al., *Salicylate-urea-based soluble epoxide hydrolase inhibitors with high metabolic and chemical stabilities*. *Bioorg Med Chem Lett*, 2009. **19**(6): p. 1784-9.
10. Kim, I.H., et al., *Optimization of amide-based inhibitors of soluble epoxide hydrolase with improved water solubility*. *J Med Chem*, 2005. **48**(10): p. 3621-9.
11. Morisseau, C. and B.D. Hammock, *Measurements of soluble epoxide hydrolase (sEH) activity* *Current Protocols in Toxicology*, ed. J.S. Bus, et al. Vol. Techniques for analysis of chemical biotransformation. 2007: John Wiley & Sons, New Jersey. 4.23.1-4.23.18.
12. Wolf, N.M., et al., *Development of a high-throughput screen for soluble epoxide hydrolase inhibition*. *Anal Biochem*, 2006. **355**(1): p. 71-80.
13. Jones, P.D., et al., *Fluorescent substrates for soluble epoxide hydrolase and application to inhibition studies*. *Anal Biochem*, 2005. **343**(1): p. 66-75.
